# Supplementary material
Source: PubMed Central journal article supplement (PMC4182331)
Supplement: NIHMS629219-supplement-4.pdf [file NIHMS629219-supplement-4.pdf]

## Supplemental Figure TOC

**Figure S1. Acentrosomal cells have no apparent defects in interphase MTs or apical-basal polarity (related to Fig1).** These data follow the observations regarding increased cell death in *sas-4* mutant wing discs presented in Fig1, and reveal that ac centrosomal cells do not possess gross defects in the microtubule cytoskeleton or apicobasal polarity.

**Figure S2. Dynamics of spindle assembly in wildtype and ac centrosomal wing disc cells (related to Fig2).** Still images from Supplemental Movies 1 and 2 demonstrating differences in microtubule nucleation and spindle assembly in wing discs with and without centrosomes, similar to the fixed images shown in Fig2.

**Figure S3. RNAi effectively knocks down targeted genes (related to Fig3 and Fig7).** Antibody staining of proteins encoded by genes that were RNAi targets demonstrates on-target effects of various lines.

**Figure S4. Acentrosomal cells rely on the Augmin complex for cell viability and proper wing development (related to Fig3).** Similar to codepletion of *Sas-4* and *Dgt2* (Fig3), knockdown of *Sas-4* and *Dgt3*, *Dgt4*, or *Dgt6* results in increased apoptosis and wing defects.

**Figure S5. Adult wing phenotypes support genetic interaction between *RCC1* and *Sas-4* (related to Fig3).** To bypass lethality associated with *Rcc1* knockdown using *ap-Gal4*, we used the wing disc specific *MS1096-Gal4* to attain adult wings for evaluating genetic interaction. *Rcc1* knockdown alone causes significant wing defects and adding *Sas-4* knockdown enhances these.

**Figure S6. Blocking apoptosis in ac centrosomal cells disrupts wing development and leads to increased expression of *Wg* and *MMP1* (related to Fig6).** Here we use an alternate *Gal-4* driver to that described in Fig6 to bypass lethality and show that blocking cell death in wing cells lacking centrosomes disrupts adult wing morphology. Blocking cell death associated with loss of centrosomes leads to increased expression of *Wg* and *MMP1*.

**Figure S7. Confirming genetic interaction between *Mud* and additional centriole duplication factors and *Mud* knockdown leads to JNK-dependent apoptosis (related to Fig7).** Similar to codepletion of *Mud* and *Sas-4*, double knockdown of *Mud* and *Asl* or *Sas-6* increases the rates of apoptosis and adult wing phenotypes, and use of a second RNAi line targeting *Mud* also enhances *Sas-4* related phenotypes. JNK mediates apoptosis due to *mud* knockdown.

**Movie S1. Spindle assembly initiates from centrosomes in wildtype wing disc cells.** Stills from this movie are shown in Fig S2.

**Movie S2. In acentrosomal cells, spindle microtubules initiate around chromatin.** Stills from this movie are shown in Fig S2.

## Supplemental Data

### Supplemental Figures

**Figure S1. Acentrosomal cells have no apparent defects in interphase MTs or apical-basal polarity (related to Fig1).** (A) Cross sectional view of a wildtype disc shows the apical and basal enrichments typical of interphase MTs in these cells. (B) We observed no appreciable difference in this MT distribution in *sas-4* mutant discs. (C) In the folds of wildtype discs, we can observe the apical accumulation of aPKC (red) and the basolateral localization of Dlg (green). (D) These patterns appear unaffected in *sas-4* mutant cells. Scale bars A-B=10mm, C-D=50mm.

**Figure S2. Dynamics of spindle assembly in wildtype andacentrosomal wing disc cells (related to Fig2).** Stills from live-imaging of a wildtype wing disc expressing the MT marker Jup:GFP and the chromatin marker His:RFP. A cell in mitotic prophase (0s; yellow arrows) shows MT nucleation at centrosomes (arrows), while the cell below segregates its chromosomes (red arrowhead). (H) In *sas-4* mutant discs, no MT nucleation activity is apparent at prophase (0s; red arrowhead). After NEB (320s), MTs begin to assembly around the chromatin (yellow arrow), and eventually form a spindle (920s); the spindle in the image shown is slightly off angle, thus the lower pole is not visible.

**Figure S3. RNAi effectively knocks down targeted genes (related to Fig3 and Fig7).** (A) *sas-4* RNAi driven by ap>GFP in the dorsal wing compartment reduces Sas-4 protein levels, as indicated by anti-Sas-4 staining. Similar results are seen for RNAi targets, Mud (B) and Pins (C).

**Figure S4. Acentrosomal cells rely on the Augmin complex for cell viability and proper wing development (related to Fig3).** (A,C,E,G) Knockdown of Augmin components Dgt3, Dgt4, or Dgt6 does not result in elevated apoptosis or adult wing defects. (B,D,F,G) However, coexpressing *sas-4* RNAi and RNAi against any of these Augmin components results in a dramatic increase in apoptosis and wing defects.

**Figure S5. Adult wing phenotypes support genetic interaction between RCC1 and Sas-4 (related to Fig3).** To avoid the lethality associated with expression of *RCC1* RNAi using ap>Gal4, we used the tissue specific MS1096-Gal4 to drive *RCC1* RNAi in the wing disc, allowing recovery of adult wings. (A) While expression of *sas-4* RNAi alone did not obviously disrupt wing morphology, knockdown of *RCC1* did lead to significant defects in adult wings (B). (C) Coexpression of *RCC1* and *sas-4* RNAi enhanced the wing phenotype, consistent with the increased apoptosis we observed in this genotype (see main Fig 3F,G).

**Figure S6. Blocking apoptosis in acentrosomal cells disrupts wing development and leads to increased expression of Wg and MMP1 (related to Fig6).** (A,B) Wings from males with MS1096-Gal4 driving *sas-4* RNAi or p35. These have minimal effect on adult wings. (C) In contrast, expressing p35 and *sas-4* RNAi, which blocks the apoptosis caused by *sas-4* RNAi, leads to dramatically disrupted wings. (D-G) Using *en>RFP* to drive the anti-apoptotic gene *p35* in the posterior compartment of a homozygous *sas-4* mutant wing disc leads to massive accumulation of Wg and MMP1 (green) in the posterior compartment.

**Figure S7. Confirming genetic interaction between between Mud and additional centriole duplication factors and Mud knockdown leads to JNK-dependent apoptosis (related to Fig7).** To verify the genetic interaction of *mud* with *sas-4*, we used double knockdown of Mud and either *Asl* or *Sas-6*, along with a separate *mud* RNAi line (28074). (A-F) While knockdown of Mud, *Asl*, or *Sas-6* alone had only moderate effects on apoptosis rates (A,B,D,F), codepletion of Mud and either *Asl* (C) or *Sas-6* (E), lead to increased cell death (F) and dysmorphic adult wings. Surprisingly, knockdown of *Sas-6* alone has rather severe effects on adult wing (D’), though the double knockdown appeared worse (E’). (G-K) While knockdown of Mud using the new RNAi line had only moderate effects on apoptosis rates (G,K) and no effect on wing morphology (I), codepletion of Mud and *Sas-4* led to increased cell death (H,K) and dysmorphic adult wings (J), thus recapitulating the genetic interaction with *sas-4* reported in the main text for *mud* RNAi line 35044. (K) Quantification of apoptosis levels in the two different *mud* RNAi lines used, with and without *sas-4* RNAi coexpression. Images and p-values for the *mud* RNAi (35044) line can be found in main Figure 7. (L) The increase in apoptosis associated with knockdown of Mud (using the stronger 35044 line) can be completely repressed by blocking JNK signaling through coexpression of *bskDN*. Scale bars=20mm.

### Supplemental movies.

**Movie S1 (Stills from this movie are shown in Fig S2).** Live imaging of control wing disc (pouch region) expressing the microtubule (MT) marker Jupiter:GFP (Jup:GFP) and the chromosomal marker His2Av:RFP (His:RFP). In these wildtype cells, strong MT nucleation initiates at the pair of centrosomes during prophase, and spindle MTs can be seen extending from the centrosomes to the chromosomes. Frame rate=10fps.

**Movie S2 (Stills from this movie are shown in Fig S2).** Live imaging of a *sas-4* mutant disc (pouch region) expressing Jup:GFP and His:RFP. In contrast to wildtype, acentrosomal cells initiate spindle MT assembly around the chromosomes. The MTs appear to grow outward and eventually coalesce to form a relatively well-focused spindle. Note the long delay at metaphase in acentrosomal cells. Frame rate=10fps.

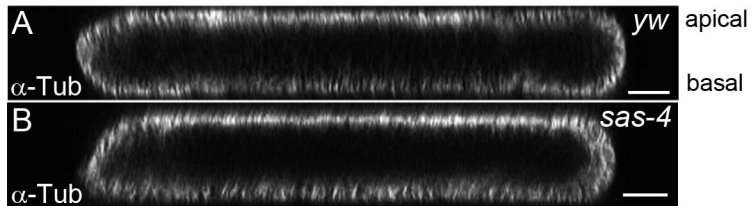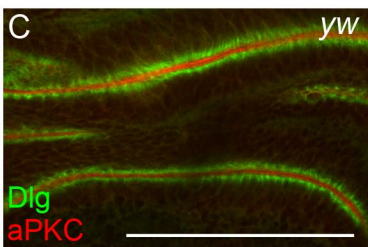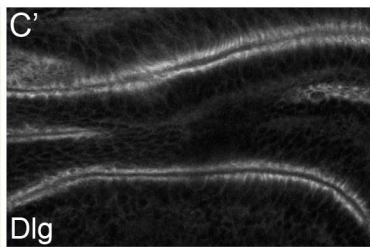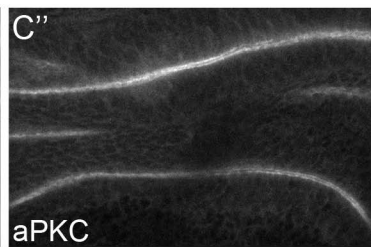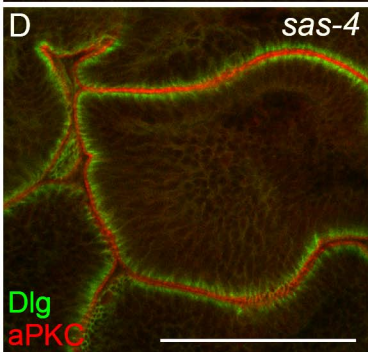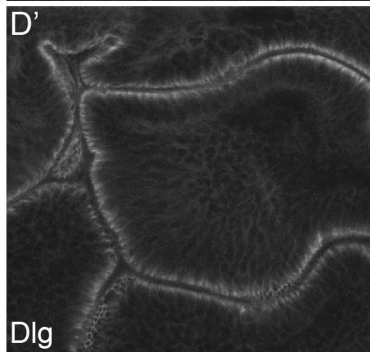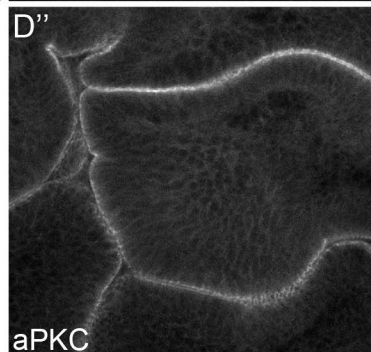

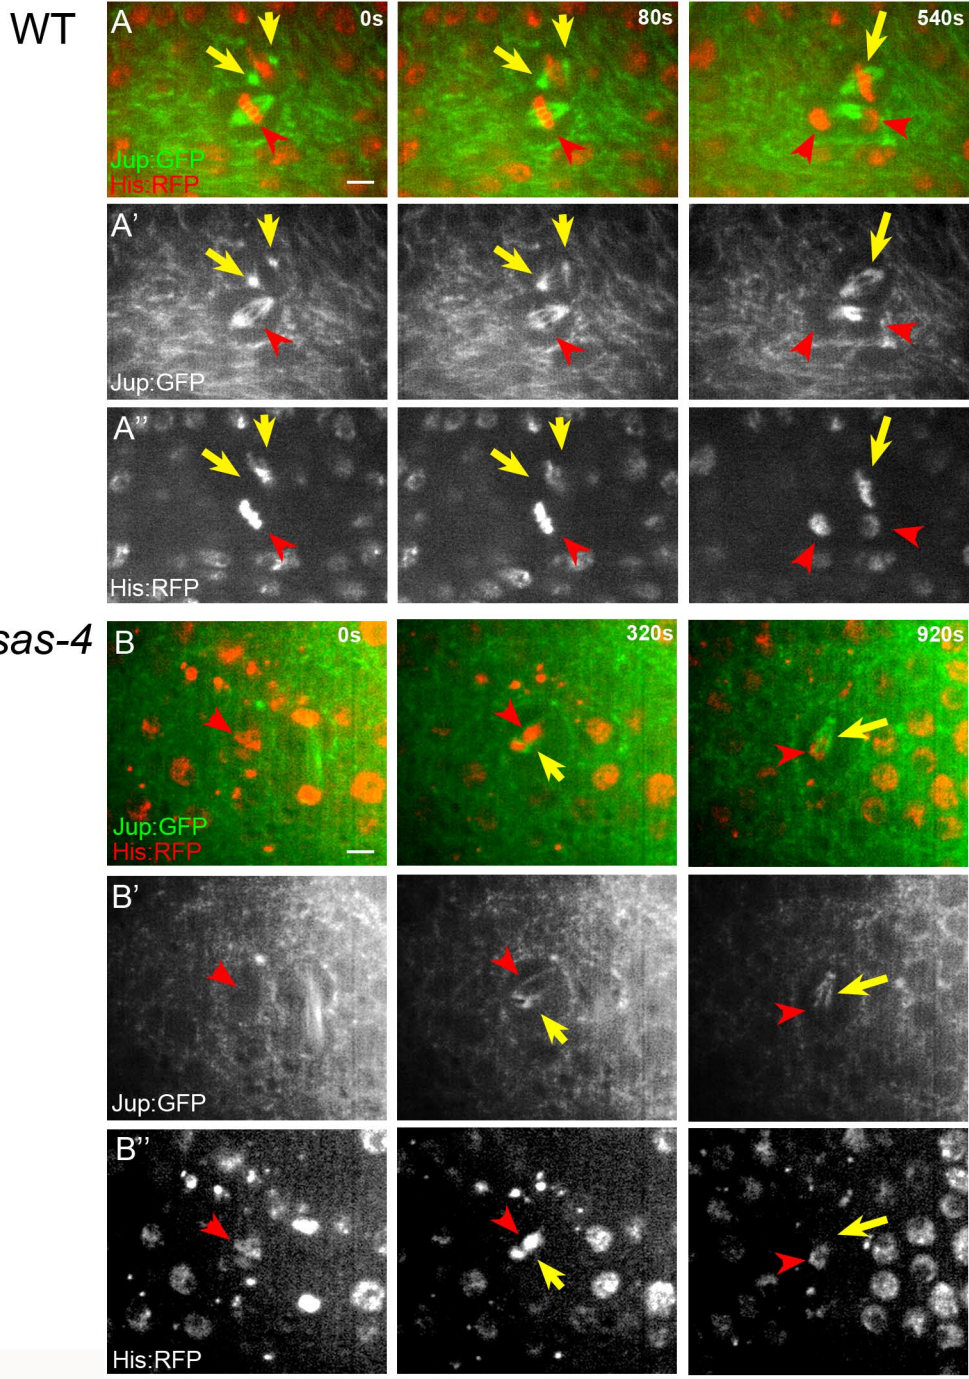

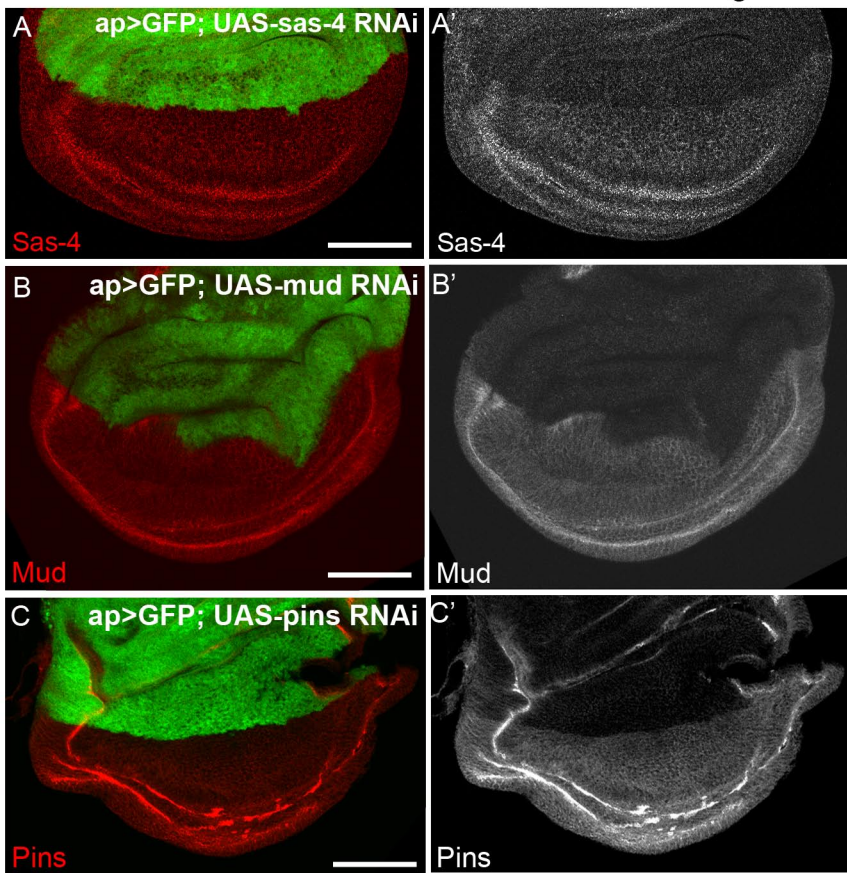

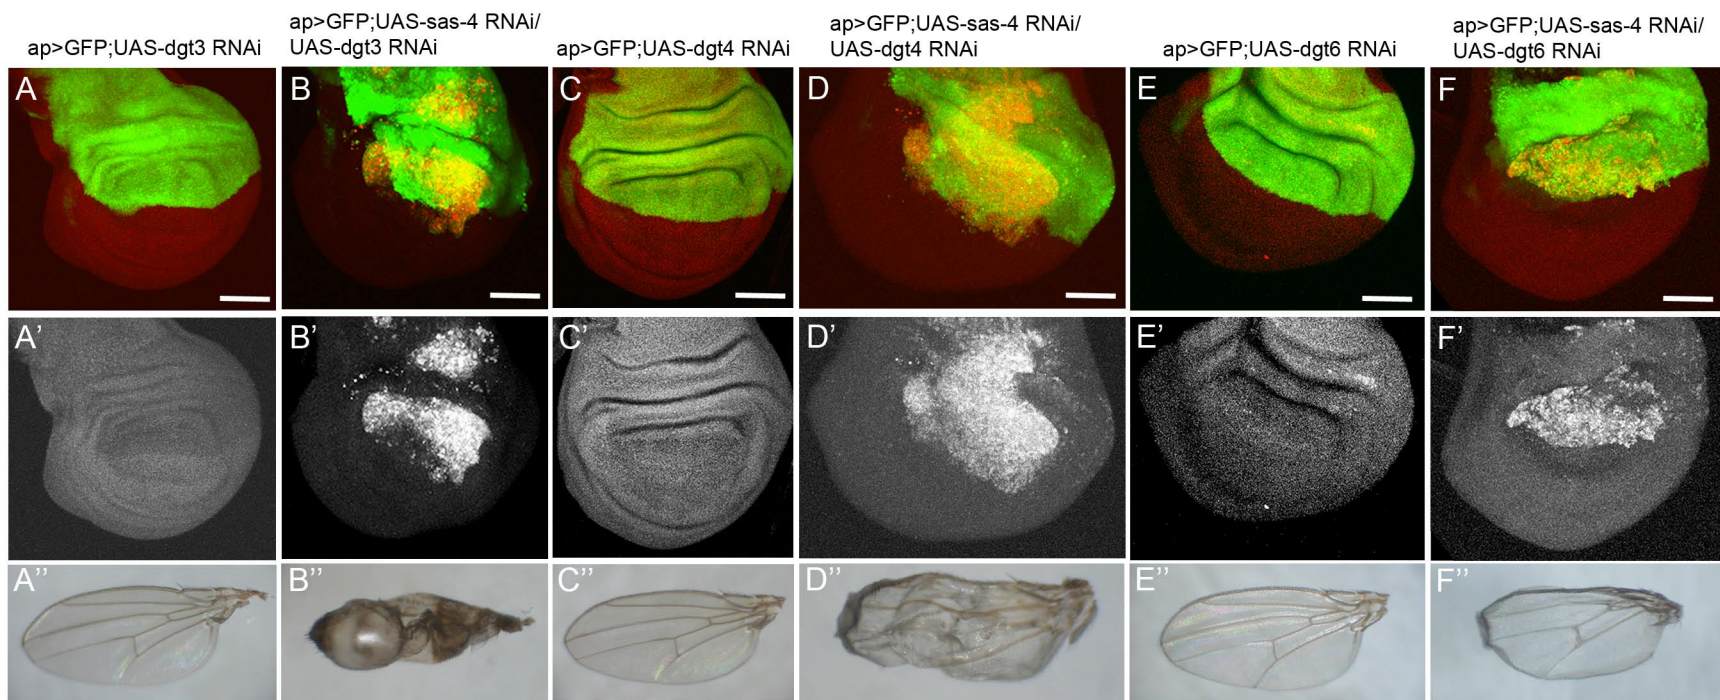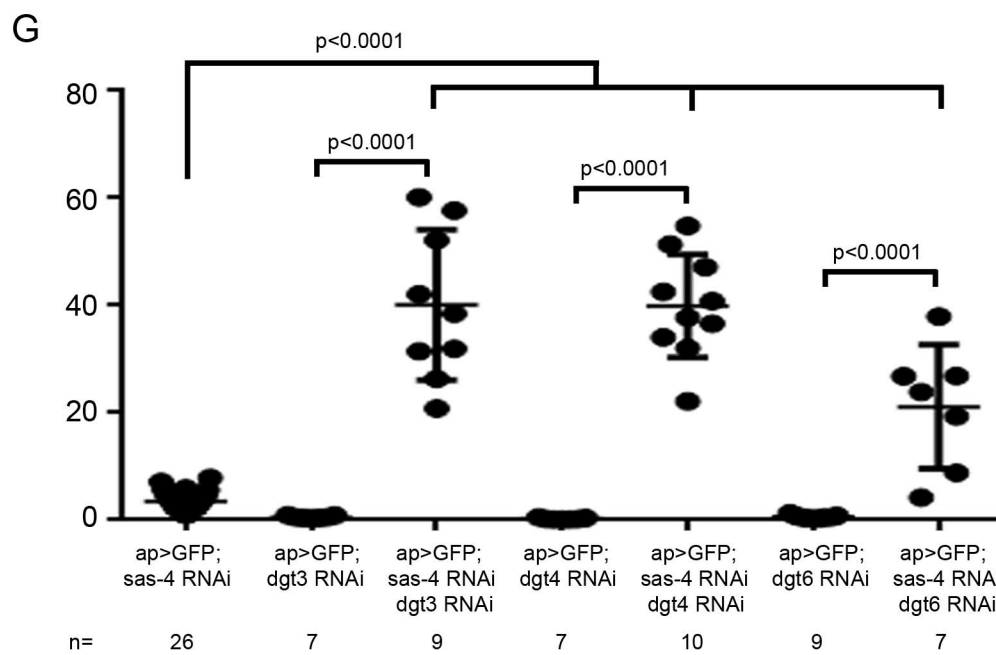

**Figure S4**



MS1096-Gal4/+;;UAS-sas-4 RNAi

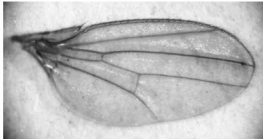

MS1096-Gal4/+;;UAS-Rcc1 RNAi

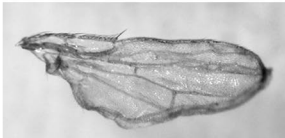

MS1096-Gal4/+;;

UAS-sas-4 RNAi/UAS-Rcc1 RNAi

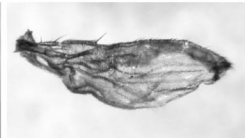

**Figure S5**

MS1096-Gal4/Y;;  
UAS-sas-4 RNAi

MS1096-Gal4/Y; UAS-p35

MS1096-Gal4/Y; UAS-p35;  
UAS-sas-4 RNAi

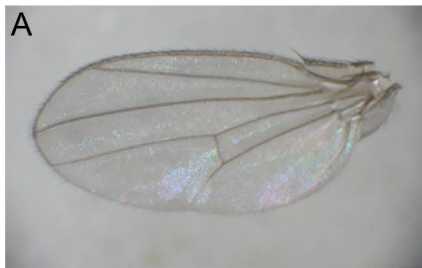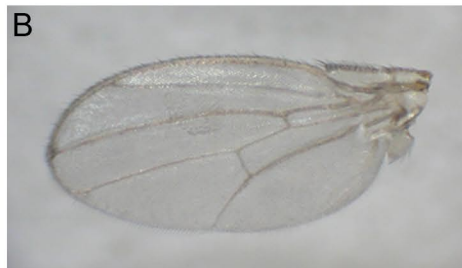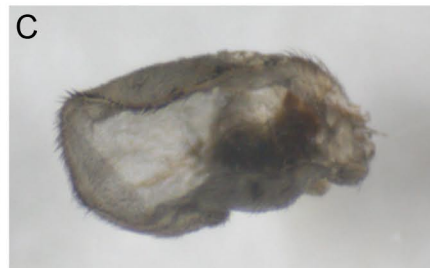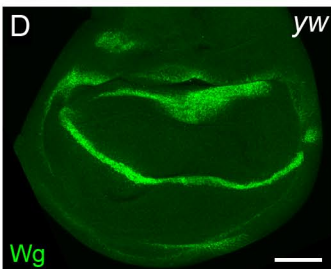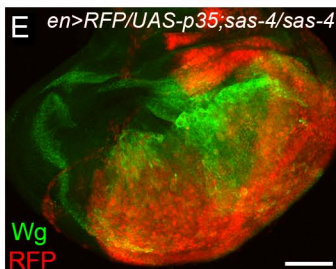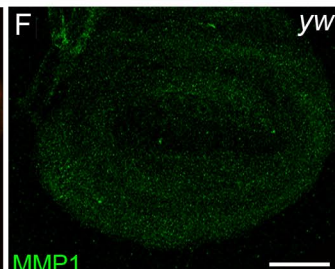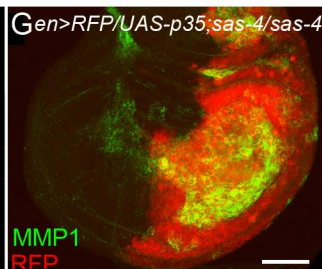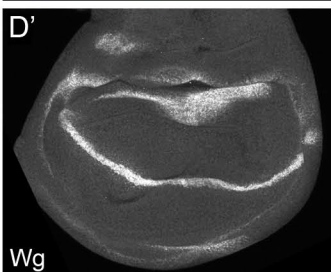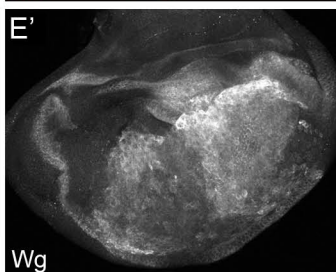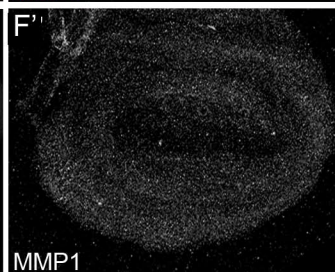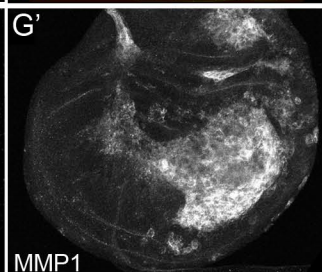

Figure S6

Figure S7

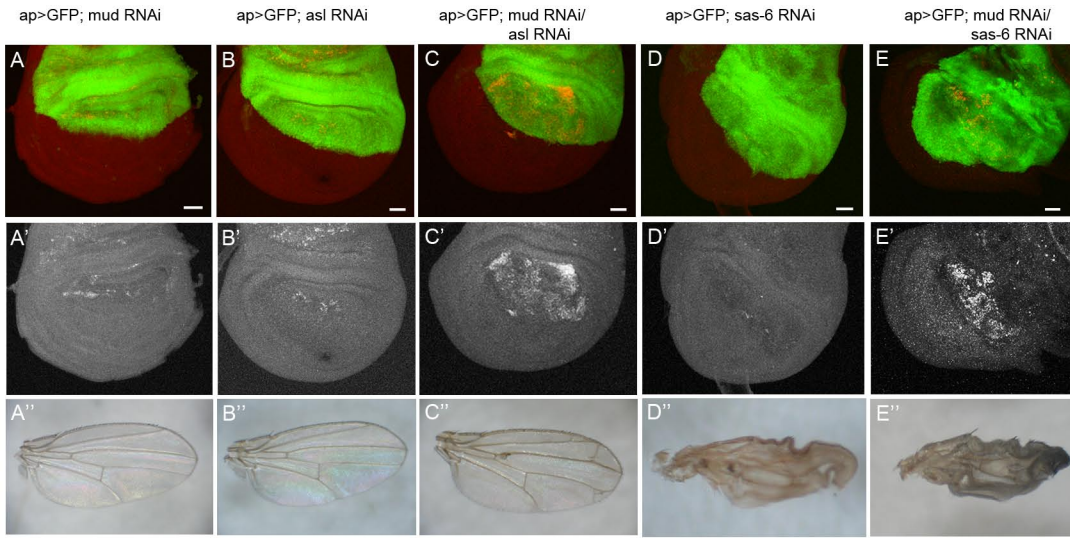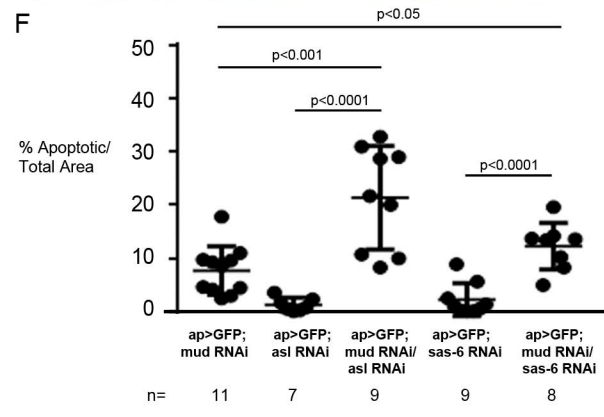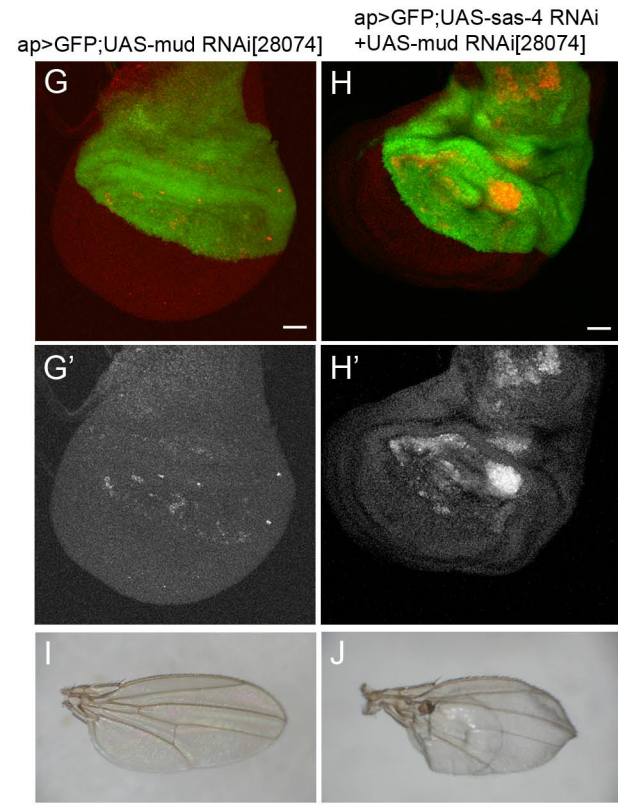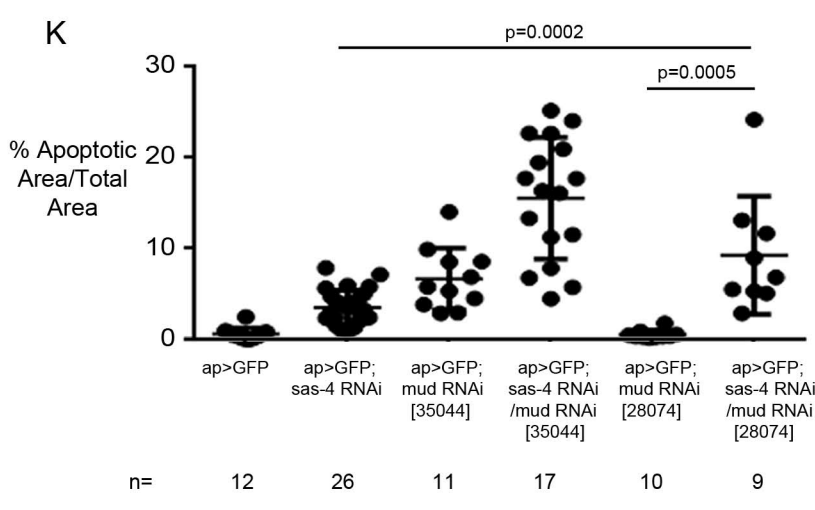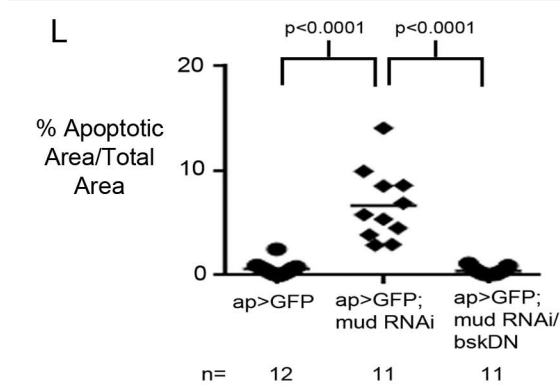

## Supplemental Experimental Procedures

| Fly stocks                    | Source                                                       |
|-------------------------------|--------------------------------------------------------------|
| <i>y w</i>                    | Bloomington Stock Center #1495 (IN, USA)                     |
| <i>sas-4</i> <sup>S2214</sup> | Bloomington Stock Center #12119                              |
| <i>cnn</i> <sup>HK21</sup>    | Bloomington Stock Center #5039                               |
| <i>UAS-sas-4 RNAi</i>         | Bloomington Stock Center #35049                              |
| <i>UAS-dgt2 RNAi</i>          | Bloomington Stock Center #31729                              |
| <i>UAS-mud RNAi</i>           | Bloomington Stock Center #35044,28074                        |
| <i>UAS-pins RNAi</i>          | Bloomington Stock Center #35048                              |
| <i>UAS-p53[H159N]</i>         | Bloomington Stock Center #8421                               |
| <i>UAS-p53[R155H]</i>         | Bloomington Stock Center #8419                               |
| <i>UAS-p35</i>                | Bloomington Stock Center #5072                               |
| <i>en-GAL4 UAS-RFP</i>        | Bloomington Stock Center #30557                              |
| <i>MS1096-GAL4</i>            | Bloomington Stock Center #8860                               |
| <i>His2Av:RFP</i>             | Bloomington Stock Center #23651                              |
| <i>UAS-Mars RNAi</i>          | Bloomington Stock Center #33929                              |
| <i>UAS-dgt3 RNAi</i>          | Vienna Drosophila Resource Center #103980 (Vienna, AUSTRIA)  |
| <i>UAS-dgt4 RNAi</i>          | Vienna Drosophila Resource Center #108969                    |
| <i>UAS-dgt6 RNAi</i>          | Vienna Drosophila Resource Center #108799                    |
| <i>UAS-RCC1 RNAi</i>          | Vienna Drosophila Resource Center #110321                    |
| <i>UAS-asl RNAi</i>           | Vienna Drosophila Resource Center #25457                     |
| <i>UAS-sas-6 RNAi</i>         | Vienna Drosophila Resource Center #25073                     |
| <i>UAS-eiger RNAi</i>         | Vienna Drosophila Resource Center #45252,                    |
| <i>asl</i> <sup>mecD</sup>    | 3,108814.                                                    |
| <i>UAS-bskDN</i>              | Blachon et al., 2008                                         |
| <i>mad2</i> <sup>P</sup>      | Adachi-Yamada et al., 1999                                   |
| <i>UAS-puc</i>                | Buffin et al., 2007                                          |
| <i>ap-Gal4 UAS-GFP</i>        | Martin-Blanco et al., 1998                                   |
| <i>Jupiter:GFP</i>            | Y. Tamori                                                    |
| <i>Polo:GFP</i>               | Karpova et al., 2006                                         |
| <i>TRE-DsRed</i>              | Moutinho-Santos et al., 1999<br>Chatterjee and Bohmann, 2012 |

## Supplemental References

- Adachi-Yamada, T., Nakamura, M., Irie, K., Tomoyasu, Y., Sano, Y., Mori, E., Goto, S., Ueno, N., Nishida, Y. and Matsumoto, K.** (1999). p38 mitogen-activated protein kinase can be involved in transforming growth factor beta superfamily signal transduction in *Drosophila* wing morphogenesis. *Mol Cell Biol* **19**, 2322-2329.
- Karpova, N., Bobinnec, Y., Fouix, S., Huitorel, P. and Debec, A.** (2006). Jupiter, a new *Drosophila* protein associated with microtubules. *Cell Motil Cytoskeleton* **63**, 301-312.
- Moutinho-Santos, T., Sampaio, P., Amorim, I., Costa, M. and Sunkel, C. E.** (1999). In vivo localisation of the mitotic POLO kinase shows a highly dynamic association with the mitotic apparatus during early embryogenesis in *Drosophila*. *Biol Cell* **91**, 585-596.
